# Supplementary material
Source: ML conference proceedings conference paper supplement (https://openreview.net/forum?id=P4op21eju0)

# Results

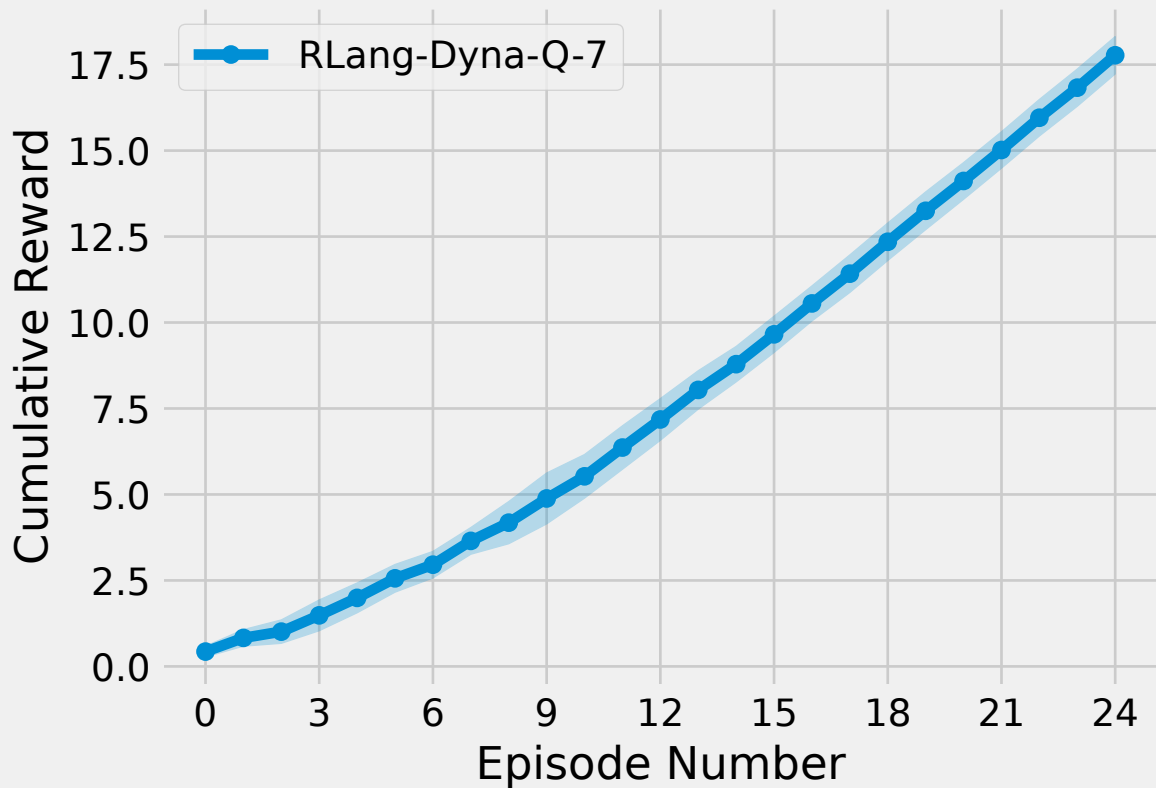

Supplement: supplementary_material [file attachment]

# Results

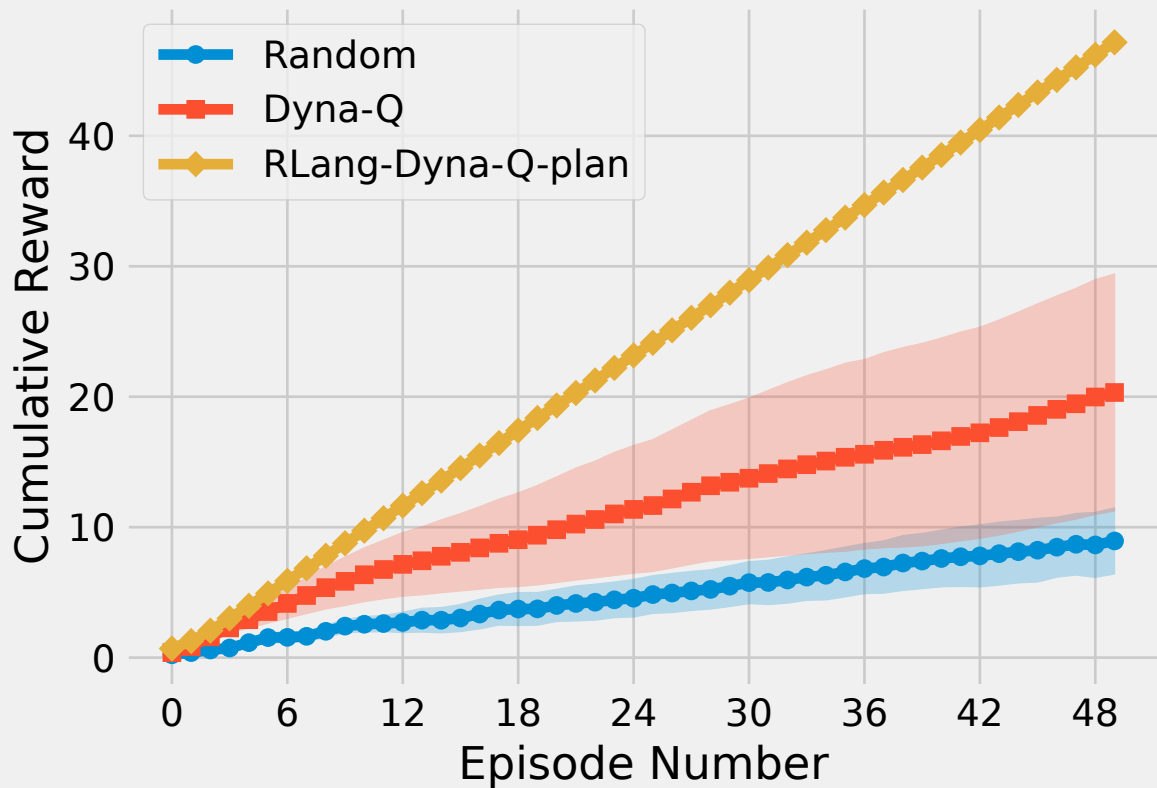

Supplement: supplementary_material [file attachment]

# Results

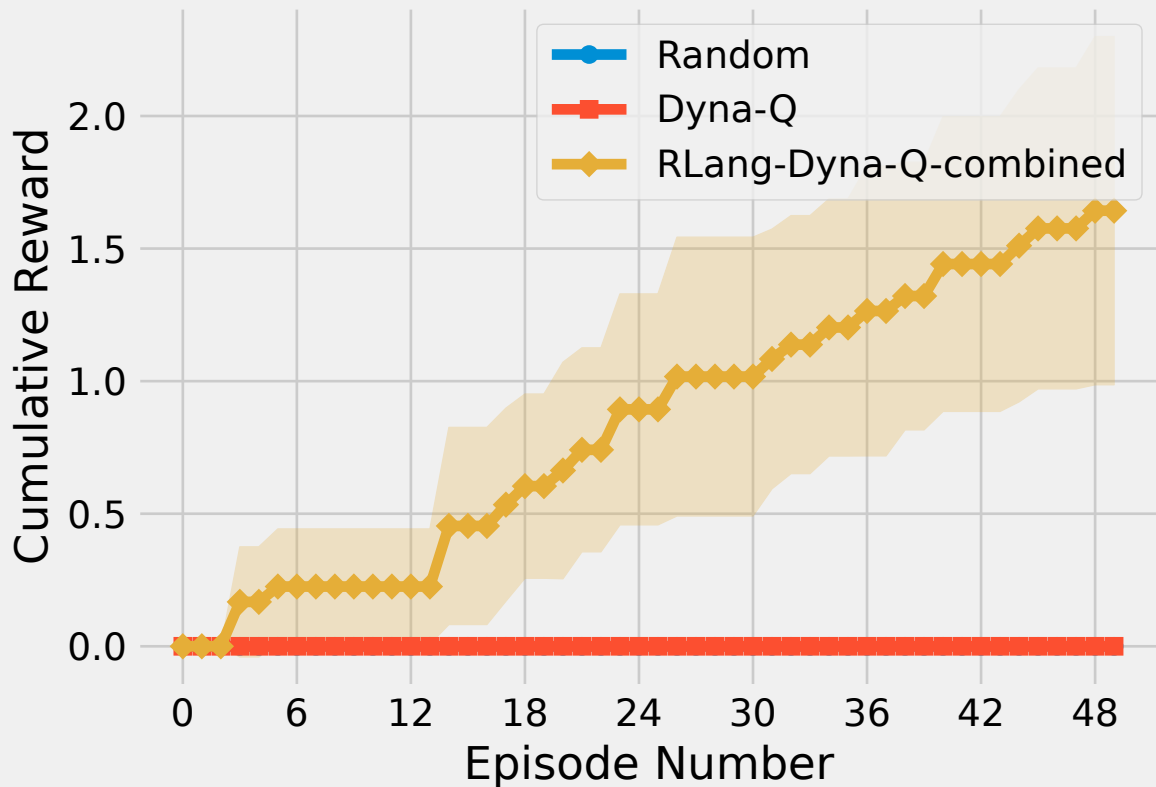

Supplement: supplementary_material [file attachment]

# Results

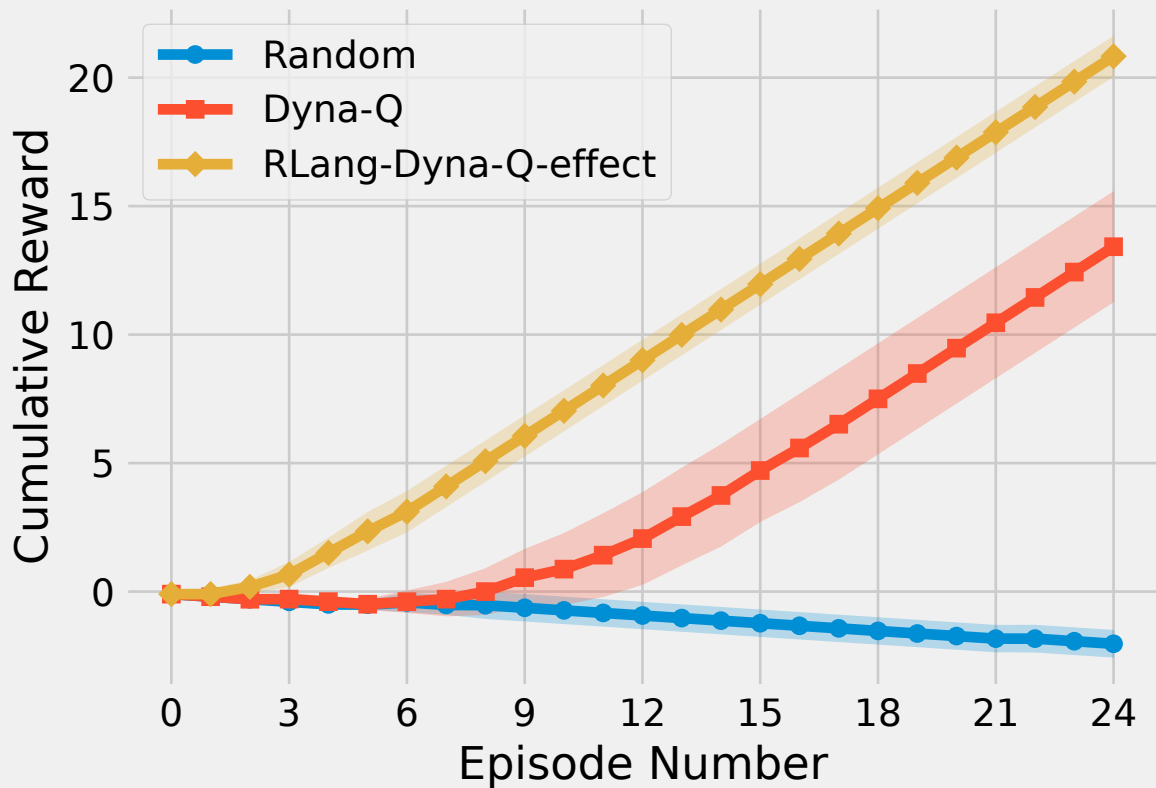

Supplement: supplementary_material [file attachment]
